# Supplementary material for: Binding of a viral IRES to the 40S subunit occurs in two successive steps mediated by eS25
Source: PubMed Central journal article supplement (PMC7430650; doi:10.1093/nar/gkaa547), 2020-07-01

## Supplementary tables and figures

**Supplementary Table 1.** Primer list for generating eS25 mutants.

**Supplementary Figure 1. Time courses are best described by a kinetic model consisting of two consecutive reactions.** (A) The [40S-IRES] complex is formed in a single step. (B) 40S and IRES form two separate 40S-IRES complexes in two distinct parallel reactions. (C) Two populations of 40S bind IRES form two separate 40S-IRES complexes in two distinct reactions. (D) The final [40S<sub>A</sub>-IRES]\* complex forms by two consecutive reactions, initial 40S and IRES binding [40S<sub>A</sub>-IRES] and conversion to the final complex. (E) Goodness of fit parameters for global fitting of the time courses for wild-type and mutant eS25 to each of the four models described above. [ $\sigma$  fit]: standard deviation of the data, a smaller value indicates a better fit. [ $X^2$ ]: total  $\chi^2$  for global fit (normalized to average sigma value), a smaller value indicates a better fit. [ $X^2 / \text{DoF}$ , DoF: degrees of freedom]: measure of goodness of fit, a value of 1 indicates a perfect fit. The smaller the value, the better the fit. [ $\sigma$  fit]: standard deviation of the data, a smaller value indicates a better fit. Model (D) yields the best fit parameters and was therefore considered for data analysis.

**Supplementary Table 2.** Upper and lower boundaries for each of the four kinetic parameters at the 95% confidence interval. Parameters are defined as in the text;  $k_1$ : association rate constant;  $k_{-1}$ : dissociation rate constant;  $k_2$ : forward rate constant for step 2;  $k_{-2}$ : reverse rate constant for step 2.

**Supplementary Table 3.** The CrPV IGR IRES (firefly luciferase) and cap-dependent (*Renilla* Luciferase) activity measured using the in *rps25 $\Delta$ a $\Delta$ b* yeast strain expressing the wild-type or mutant eS25 from a plasmid as the sole source of eS25 in the cell. SD for n=3 biological repeats are indicated. Also, shown are the relative levels of eS25 in whole cell lysates from yeast strains expressing eS25 mutants which were determined by quantitative western analysis of eS25

levels normalized to PGK levels and expressed relative to wild-type which was set to 100%. p-values were determined by a Student's *t*-test.

**Supplementary Figure 2.** Purified yeast ribosomal subunits contain eS25. Western analysis of ribosomal subunits isolated from yeast strains expressing wild-type eS25, *rps25ΔaΔb*, or *rps25ΔaΔb* yeast expressing the indicated mutant eS25 from a plasmid. The eS25 levels were quantified relative to the control, ribosomal protein S6 (eS6) and normalized to wild-type. Shown is representative of *n* = 3.

**Supplementary Figure 3.** The CrPV IGR IRES activity of the eS25 mutations mapped onto the structure of eS25 from PDB 4V7E. Colors represent CrPV IGR IRES activity: dead (red, <10%), low (orange, 17-29%), modest (white, 32-48%), wild-type (green, 72-128%), and increased (black, >139%) activity, and gray indicates residues that were not assayed.

**Supplementary Figure 4.** Association and dissociation of 40S-IRES complexes with mutant eS25 (A) Time-courses for 40S-IRES association. The concentration of [40S-eS25] is indicated in the panels. Concentration of [IRES] = 1 nM (●), 2.5 nM (○) and 4 nM (◆); except for R103A, where [IRES] = 2 nM (●), 5 nM (○) and 8 nM (◆). 40S and IRES concentrations were chosen to accomplish similar experimental time frames for the different eS25 mutations. Lines show the global fit to the two-step kinetic model described in Fig 1F, augmented with an equilibrium step for interconversion between 40S subunits that are competent for IRES binding and 40S subunits that are not (Fig 5A). (B) Time-courses for IRES dissociation from the 40S subunit ([40S-eS25] = 2 nM, [IRES] = 2 nM, except for R68A, where ([40S-eS25] = 8 nM, [IRES] = 8 nM. [Chase RNA] = 900 nM for all experiments). Error bars indicate one standard deviation of multiple (*n* ≥ 3)

independent experiments. Lines show the global fit to the kinetic model described in Fig 5A.

**Supplementary Figure S5. 60S subunit joining stabilizes 80S complex formation.** <sup>32</sup>P-labelled wild-type (solid lines) or mutant (cc-gg; dotted lines) CrPV IGR IRES RNA was incubated with purified 40S subunits with the indicated eS25 mutations ((A-F): Wild-type, W27A, K33A, R58A, R68A, R103A, respectively). Then 60S subunits were added (gray) or not (black) and the 80S-IRES complexes were allowed to form for 20 minutes before 450-fold excess unlabeled wild-type CrPV IGR IRES was added to compete off labeled CrPV IGR IRES. Maximal complex formation before competitor was added (0 minutes) was set to 1, complexes were measured by filter binding assays from 1 to 60 minutes post competitor RNA addition.

**Supplementary Figure 6.** eS25 residues create binding pocket for CrPV IGR IRES. The binding surface of the CrPV IGR IRES (blue) to the 40S subunit (gray) in relation to eS25 (red) from PDB 5IT9. eS25 residues (Y57, R58, V64, and R68) form a pocket-like structure for SL2.3 of the CrPV IGR IRES to insert into.

**Supplementary Table 1.** Primer list for generating eS25 mutants.

| Mutant<br><i>rps25a</i> | Primer (5'-3')              |                             |
|-------------------------|-----------------------------|-----------------------------|
|                         | Forward                     | Reverse                     |
| A15F                    | AAAGCCGCTTTTGCCCTTGC        | GCAAGGGCAAAAAGCGGCTTT       |
| A18F                    | CTGCTGCCCTTTTCGGTGGTAAGAA   | TTCTTACCACCGAAAAGGGCAGCAG   |
| G20A                    | GCTGCCCTTGCTGGTGCTAAGAAGTC  | CTTCTTAGACTTAGCACCAGCAA     |
| K21A                    | CTGCTGCCCTTGCTGCTGGTGCTAAG  | GACCACTTCTTCTTAGACTTAGCACC  |
| K24A                    | GCTGGTGGTAAGAAGTCTGCTAAGAA  | CTTTTTGGACCACTTCTTAGCAGACTT |
| K25A                    | GGTGGTAAGAAGTCTAAGGCTAAGTG  | GGACTTTTTGGACCACTTAGCCTTAG  |
| K26A                    | GTGGTAAGAAGTCTAAGAAGGCGTG   | CATGGACTTTTTGGACCACGCCTTCT  |
| W27A                    | GGTAAGAAGTCTAAGAAGAAGGCTTC  | GTCTTTCATGGACTTTTTGGAAGCCTT |
| W27F                    | GTGGTAAGAAGTCATAGAAGAAGTTT  | TCTGTCTTTCATGGACTTTTTGGAAAA |
| W27L                    | CTAAGAAGAAGCTCTCCAAAAAGTC   | GACTTTTTGGAGAGCTTCTTCTTAG   |
| S28A                    | GTAAGAAGTCTAAGAAGAAGTGGGCT  | CTGTCTTTCATGGACTTTTTAGCCAC  |
| K29A                    | GAGCTCTGTCTTTCATGGACTTAGCG  | GAAGTCTAAGAAGAAGTGGTCCGCTA  |
| S31A                    | GAAGAAGTGGTCCAAAAAGGCTATGA  | GTGTTGAGCTCTGTCTTTCATAGCCT  |
| K33A                    | GAAGTGGTCCAAAAAGTCCATGGCTG  | GACAGCGTGTGAGCTCTGTCAGCCA   |
| R35A                    | CATGAAAGACGCAGCTCAACAC      | GTGTTGAGCTGCGTCTTTCATG      |
| Q37A                    | AAGACAGAGCTGCTCACGCTGTCAT   | ATGACAGCGTGAGCAGCTCTGTCTT   |
| H38A                    | ACAGAGCTCAAGCAGCTGTCATTTT   | AAAATGACAGCTGCTTGAGCTCTGT   |
| V40A                    | GACAGAGCTCAACACGCTGCTATTTT  | ACTTCTCTGGTCTAAAATAGCAGCG   |
| Q44A                    | TCATTTTAGACGCAGAGAAGTACG    | CGTACTTCTCTGCGTCTAAAATGA    |
| Y47A                    | ACCAAGAGAAGGCAGACAGAATCTT   | AAGATTCTGTCTGCCTTCTTTGGT    |
| R49A                    | AGAAGTACGACGCCATCTTGAAGGA   | TCTTCATGCTGCGGTAGAACTTCT    |
| K52A                    | ACAGAATCTTGGCAGAAGTTCCAAC   | GTTGGAATCTGCCAAGATTCTGT     |
| E53A                    | CGACAGAATCTTGAAGGCTGTTCCAA  | CGTATCTGTAAGTTGGAACAGCCTTC  |
| P55A                    | GACAGAATCTTGAAGGAAGTTGCTAC  | GACAGAAACGTATCTGTAAGTAGCAA  |
| Y57A                    | GAATCTTGAAGGAAGTTCCAAGTCT   | CAAAACAGAGACAGAAACGTATCTAG  |
| R58A                    | GACCAAAACAGAGACAGAAACGTATG  | GAATCTTGAAGGAAGTTCCAAGTCT   |
| R58D                    | TTCCAAGTACGACTACGTTTCTGT    | ACAGAAACGTAGTCGTAAGTTGGAA   |
| R58K                    | CTTGAAGGAAGTTCCAAGTCTACAAT  | CAAAACAGAGACAGAAACGTATTTGT  |
| R58Q                    | TTCTGTCTCTGTTTTGGTCGACCAATT | CTAAAGAACCACCAATCTTTAATTGGT |
| Y59A                    | CAACTTACAGAGCTGTTTCTGTCTC   | GAGACAGAAACAGCTCTGTAAGTTG   |
| V60A                    | TTACAGATACGCGTCTGTCTCTGT    | ACAGAGACAGACGCGTATCTGTAA    |
| S61A                    | CAGATACGTTGCTGTCTCTG        | CAGAGACAGCAACGTATCTG        |
| V62A                    | ATACGTTTCTGCGTCTGTTTTGGT    | ACCAAAACAGACGCAGAAACGTAT    |

|             |                                               |                                                |
|-------------|-----------------------------------------------|------------------------------------------------|
| V64A        | TCTGTCTCTGCATTGGTCGACA                        | TGTCGACCAATGCAGAGACAGA                         |
| L65A        | TGTCTCTGTTGCGGTGACAGA                         | TCTGTGACCGCAACAGAGACA                          |
| V66A        | CTCTGTTTTGGCCGACAGATTA                        | TAATCTGTGGCCAAAACAGAG                          |
| D67A        | CTGTTTTGGTCGCGAGATTAAGAT                      | ATCTTTAATCTCGCGACCAAACAG                       |
| R68A        | GTTTTGGTCGACGCATTAAGATTG                      | CAATCTTTAATGCGTCGACCAAAC                       |
| R68D        | TTTTGGTCGACGACTTAAGATTGG                      | CCAATCTTTAAGTCGTCGACCAAAA                      |
| L69A        | GTCTCTGTTTTGGTCGACAGAGCAAA                    | GCTAAAGAACCACCAATCTTTGCTCT                     |
| K70A        | CTGTTTTGGTCGACAGATTAGCGATT                    | CTAGCTAAAGAACCACCAATCGCTAA                     |
| I71A        | ACAGATTAAGGCTGGTGGTTCTT                       | AAGAACCACCAGCCTTTAATCTGT                       |
| L75A        | GATTAAGATTGGTGGTTCTGCTGCT                     | GTGTCTCAAAGCAATTCTAGCAGCAG                     |
| G87A        | GGAAAAGGAAGCAATCATCAAGCC                      | GGCTTGATGATTGCTTCCTTTTCC                       |
| I89A        | AAAAGGAAGGTGCGATCAAGCCAAT                     | ATTGGCTTGATCGCACCTTCTTTT                       |
| S93A        | TCAAGCCAATCGCAAAGCACTCCAA                     | TTGGAGTGCTTTGCGATTGGCTTGA                      |
| K94A        | GGTATCATCAAGCCAATCTCCGCTCA                    | GTAGATATCTTGCTTGGAGTGAGCGG                     |
| H95A        | ATCATCAAGCCAATCTCCAAGGCTTC                    | GGTGTAGATAGCTTGCTTGAAGCCT                      |
| S96A        | CAAGCCAATCTCCAAGCAGCTAAGCAAGCTATCT<br>ACACCAG | CTGGTGTAGATAGCTTGCTTAGCGTGCTTGGAGATT<br>GGCTTG |
| K97A        | CCAATCTCCAAGCACTCCGCTCAAGC                    | CTCTGGTGTAGATAGCTTGAGCGGAG                     |
| Q98A        | AGCACTCCAAGGCTGCTATCTACA                      | GTGTAGATAGCAGCCTTGAGTGCT                       |
| A99F        | ACTCCAAGCAATTCATCTACACCAG                     | CTGGTGTAGATGAATTGCTTGGAGT                      |
| I100A       | CCAAGCAAGCTGCATACACCAGAGC                     | GCTCTGGTGTATGCAGCTTGCTTGG                      |
| Y101A       | CAAGCTATCGCCACCAGAGCT                         | AGCTCTGGTGGCGATAGCTTG                          |
| T102A       | AGCTATCTACGCCAGAGCTA                          | TAGCTCTGGCGTAGATAGCT                           |
| R103A       | TATCTACACCGCAGCTACTGCT                        | AGCAGTAGCTGCGGTGTAGATA                         |
| A104F       | CTACACCAGATTTACTGCTTCT                        | AGAAGCAGTAAATCTGGTGTAG                         |
| T105A       | ACCAGAGCTGCTGCTTCTG                           | CAGAAGCAGCAGCTCTGGT                            |
| S107A       | AGAGCTACTGCTGCTGAA                            | TTCAGCAGCAGTAGCTC                              |
| ΔC-terminal | AAGCACTCCAAGTAAGCTATCTAC                      | TGTAGATAGCTTACTTGGAGTGCTT                      |

## Walters\_Supplementary Table 2

**Supplementary Table 2** Upper and lower boundaries for each of the four kinetic parameters at the 95% confidence interval

| 40S Identity | $k_1$<br>( $M^{-1}min^{-1}$ ) | Lower bound       | Upper bound       | $k_{-1}$<br>( $min^{-1}$ ) | Lower bound | Upper bound | $k_2$<br>( $min^{-1}$ ) | Lower bound | Upper bound | $k_{-2}$<br>( $min^{-1}$ ) | Lower bound | Upper bound |
|--------------|-------------------------------|-------------------|-------------------|----------------------------|-------------|-------------|-------------------------|-------------|-------------|----------------------------|-------------|-------------|
| Wild-type    | $1.00 \cdot 10^9$             | $9.05 \cdot 10^8$ | $1.11 \cdot 10^9$ | 4.21                       | 3.90        | 5.23        | 0.127                   | 0.115       | 0.175       | 0.0071                     | 0.0057      | 0.0157      |
| K33A         | $6.57 \cdot 10^8$             | $5.23 \cdot 10^8$ | $9.19 \cdot 10^8$ | 6.39                       | 4.79        | 9.48        | 0.311                   | 0.279       | 0.338       | 0.0105                     | 0.0083      | 0.0130      |
| R103A        | $1.70 \cdot 10^8$             | $1.29 \cdot 10^8$ | $2.66 \cdot 10^8$ | 2.09                       | 1.08        | 4.88        | 0.803                   | 0.573       | 1.12        | 0.0133                     | 0.0085      | 0.0187      |
| W27A         | $3.69 \cdot 10^7$             | $2.52 \cdot 10^7$ | $5.66 \cdot 10^7$ | 1.66                       | 0.67        | 4.37        | 0.699                   | 0.501       | 1.16        | 0.0129                     | 0.0083      | 0.0212      |
| R58A         | $4.85 \cdot 10^8$             | $4.19 \cdot 10^8$ | $5.60 \cdot 10^8$ | 3.43                       | 2.96        | 4.37        | 0.207                   | 0.187       | 0.241       | 0.0086                     | 0.0068      | 0.0102      |
| R68A         | $2.50 \cdot 10^7$             | $2.22 \cdot 10^7$ | $3.94 \cdot 10^7$ | 5.64                       | 4.95        | 9.46        | 0.097                   | 0.071       | 0.124       | 0.0183                     | 0.0075      | 0.0268      |

**Supplementary Table 3.** eS25 expression levels and dual-luciferase raw values in yeast

| Mutant eS25      | Percent IRES <sup>a</sup> Activity | Percent eS25 Protein <sup>b</sup> (%) | Firefly Luciferase Raw Values (RLUs) <sup>c</sup> (x10 <sup>3</sup> ) | <i>Renilla</i> Luciferase Raw Values (RLUs) (x10 <sup>6</sup> ) <sup>c</sup> | <i>p</i> -value |
|------------------|------------------------------------|---------------------------------------|-----------------------------------------------------------------------|------------------------------------------------------------------------------|-----------------|
| Wild-type        | 100                                | 100                                   | 33±6                                                                  | 7.6±1.2                                                                      | -               |
| <i>rps25ΔaΔb</i> | 2                                  | 0                                     | 0.64±0.053                                                            | 7.6±2.0                                                                      | 0.01            |
| Δ19              | 45                                 | 233                                   | 15±4.0                                                                | 5.0±2.0                                                                      | 0.02            |
| Δ39              | 5                                  | 63                                    | 0.63±0.019                                                            | 3.0±0.5                                                                      | 0.01            |
| A15F             | 32                                 | 173                                   | 11±2.0                                                                | 10.0±0.2                                                                     | 0.02            |
| A18F             | 39                                 | 179                                   | 11±0.4                                                                | 9.1±1.1                                                                      | 0.04            |
| G20A             | 126                                | 89                                    | 33±2.0                                                                | 7.9±0.49                                                                     | 0.23            |
| K21A             | 72                                 | 100                                   | 23±6.0                                                                | 9.3±1.2                                                                      | 0.09            |
| K24A             | 74                                 | 111                                   | 8.0±1.0                                                               | 8.4±0.44                                                                     | 0.11            |
| K25A             | 95                                 | 128                                   | 9.0±0.4                                                               | 6.6±0.08                                                                     | 0.41            |
| K26A             | 47                                 | 100                                   | 4.5±0.6                                                               | 5.5±0.63                                                                     | 0.04            |
| W27A             | 22                                 | 115                                   | 2.0±0.2                                                               | 5.4±0.63                                                                     | 0.02            |
| W27F             | 34                                 | 62                                    | 13±1.5                                                                | 11.0±1.4                                                                     | 0.04            |
| W27L             | 20                                 | 55                                    | 6±0.2                                                                 | 5.9±0.39                                                                     | 0.02            |
| S28A             | 110                                | 177                                   | 20±2.0                                                                | 5.5±0.23                                                                     | 0.28            |
| K29A             | 46                                 | 145                                   | 11±1.0                                                                | 7.0±0.61                                                                     | 0.06            |
| S31A             | 123                                | 21                                    | 33±9                                                                  | 4.5±0.97                                                                     | 0.31            |
| K33A             | 41                                 | 145                                   | 13±1.0                                                                | 6.6±0.70                                                                     | 0.06            |
| R35A             | 101                                | 98                                    | 16±0.7                                                                | 4.2±0.55                                                                     | 0.46            |
| Q37A             | 114                                | 152                                   | 31±3.0                                                                | 8.6±1.4                                                                      | 0.07            |

|      |     |     |          |           |       |
|------|-----|-----|----------|-----------|-------|
| H38A | 114 | 54  | 28±2.0   | 7.6±0.25  | 0.23  |
| V40A | 299 | 165 | 33±0.5   | 3.8±1.0   | 0.08  |
| Q44A | 139 | 130 | 40±3.0   | 6.5±1.3   | 0.26  |
| Y47A | 189 | 112 | 44±4.0   | 4.9±0.35  | 0.08  |
| R49A | 36  | 189 | 12±0.7   | 11.0±0.55 | 0.02  |
| K52A | 206 | 134 | 32±1.0   | 3.3±0.70  | 0.05  |
| E53A | 48  | 105 | 29±2.0   | 6.4±1.7   | 0.06  |
| P55A | 178 | 81  | 26±1.8   | 10±1.3    | 0.02  |
| Y57A | 29  | 130 | 6±0.2    | 4.8±0.75  | 0.03  |
| R58A | 29  | 89  | 6.0±0.8  | 9.0±0.10  | 0.02  |
| R58D | 5   | 97  | 2.1±0.1  | 9.9±0.46  | 0.01  |
| R58K | 60  | 129 | 19±0.5   | 9.4±1.1   | 0.05  |
| R58Q | 34  | 129 | 13±1.0   | 8.7±0.73  | 0.02  |
| Y59A | 41  | 61  | 16±1.5   | 8.3±0.7   | 0.01  |
| V60A | 231 | 78  | 51±0.13  | 5.0±0.4   | 0.03  |
| S61A | 48  | 76  | 29±2     | 6.4±1.6   | 0.06  |
| V62A | 96  | 75  | 21±0.9   | 6.9±1.1   | 0.44  |
| V64A | 25  | 121 | 7.5±2.0  | 6.7 ±0.71 | 0.03  |
| L65A | 40  | 98  | 27±2.0   | 7.8±1.6   | 0.05  |
| V66A | 103 | 54  | 45±3.0   | 9.1±0.31  | 0.38  |
| D67A | 204 | 72  | 80±8.6   | 9.1±1.3   | 0.02  |
| R68A | 6   | 96  | 2.0±0.42 | 6.0±0.68  | 0.01  |
| R68D | 2   | 67  | 1.0±0.04 | 9.6±0.46  | 0.01  |
| L69A | 201 | 157 | 21±2.3   | 6.1±0.31  | 0.003 |
| K70A | 72  | 100 | 13±2.0   | 6.0±0.74  | 0.09  |
| I71A | 184 | 80  | 47±3.0   | 7.5±0.41  | 0.01  |
| L75A | 72  | 126 | 20±0.84  | 8.1±0.54  | 0.18  |
| G87A | 120 | 192 | 33±0.5   | 8.4±0.53  | 0.16  |
| I89A | 78  | 100 | 35±0.7   | 9.6±1.3   | 0.24  |



|             |     |     |        |           |      |
|-------------|-----|-----|--------|-----------|------|
| S93A        | 92  | 211 | 41±3.0 | 9.1±0.43  | 0.28 |
| K94A        | 84  | 105 | 26±1.0 | 9.2±0.33  | 0.20 |
| H95A        | 97  | 181 | 40±3.0 | 8.5±2.0   | 0.46 |
| S96A        | 113 | 152 | 33±5.0 | 8.6 ±0.65 | 0.25 |
| K97A        | 151 | 70  | 42±0.9 | 8.4±0.86  | 0.01 |
| Q98A        | 43  | 64  | 31±1.0 | 7.2±0.15  | 0.04 |
| A99F        | 34  | 46  | 25±3.0 | 7.6±0.44  | 0.04 |
| I100A       | 59  | 132 | 42±0.7 | 9.0±0.30  | 0.07 |
| Y101A       | 63  | 165 | 30±1.0 | 10±1.2    | 0.02 |
| T102A       | 38  | 130 | 11±0.4 | 6.1±0.54  | 0.03 |
| R103A       | 32  | 110 | 10±2.0 | 7.0±0.95  | 0.06 |
| A104F       | 72  | 111 | 50±4.0 | 7.8±1.6   | 0.05 |
| T105A       | 88  | 172 | 31±2.0 | 7.2±0.52  | 0.26 |
| S107A       | 39  | 90  | 23±2.0 | 6.0±0.58  | 0.02 |
| ΔC-terminal | 41  | 96  | 18±0.2 | 9.0±0.30  | 0.03 |

<sup>a</sup> Percent of CrPV IGR IRES activity relative to CrPV IGR IRES activity of wild-type eS25 set to 100%.

<sup>b</sup> Percent of mutant eS25 protein relative to wild-type eS25 protein levels set to 100%.

<sup>c</sup> SD for n=3 is shown.

Walters\_Supplementary Fig S1

**A**

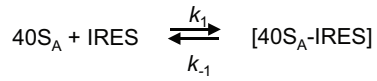

**B**

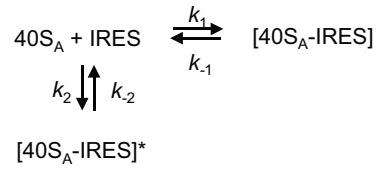

**C**

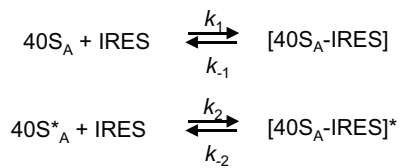

**D**

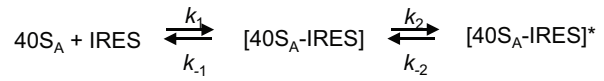

**E**

| Model | $\chi^2$ |      |      |      | $\chi^2 / \text{DoF}$ |      |      |      | $\sigma$ fit |        |        |        |
|-------|----------|------|------|------|-----------------------|------|------|------|--------------|--------|--------|--------|
|       | WT       | R58A | R68A | W27A | WT                    | R58A | R68A | W27A | WT           | R58A   | R68A   | W27A   |
| (a)   | 7839     | 157  | 282  | 86.8 | 218                   | 3.91 | 4.41 | 2.06 | 0.502        | 0.0313 | 0.111  | 0.0917 |
| (b)   | 140      | 61.2 | 380  | 83.7 | 4.12                  | 1.61 | 6.23 | 2.09 | 0.0563       | 0.0236 | 0.0447 | 0.0610 |
| (c)   | 111      | 166  | 385  | 92.8 | 3.48                  | 4.61 | 6.42 | 2.44 | 0.0565       | 0.0699 | 0.171  | 0.0917 |
| (d)   | 131      | 59.2 | 98.0 | 54.5 | 3.43                  | 1.51 | 1.66 | 1.47 | 0.0509       | 0.0216 | 0.0229 | 0.0341 |

Walters\_Supplementary Fig S2

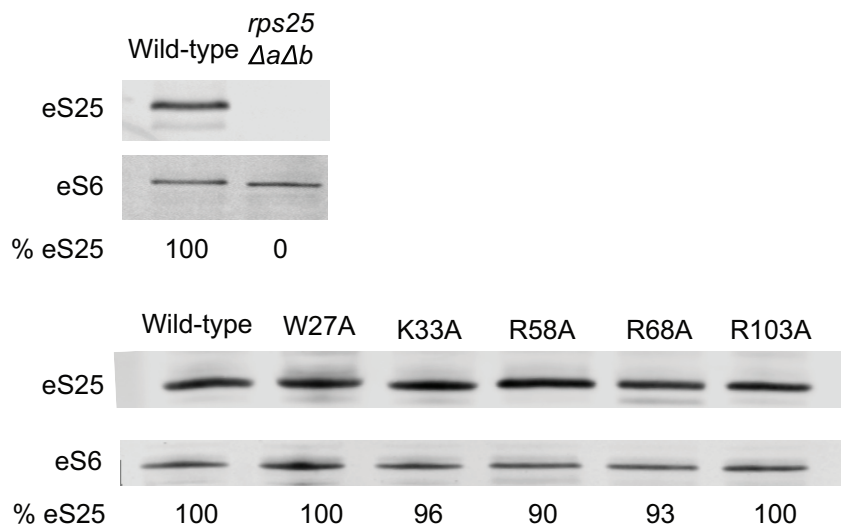

Walters\_Supplementary Fig S3

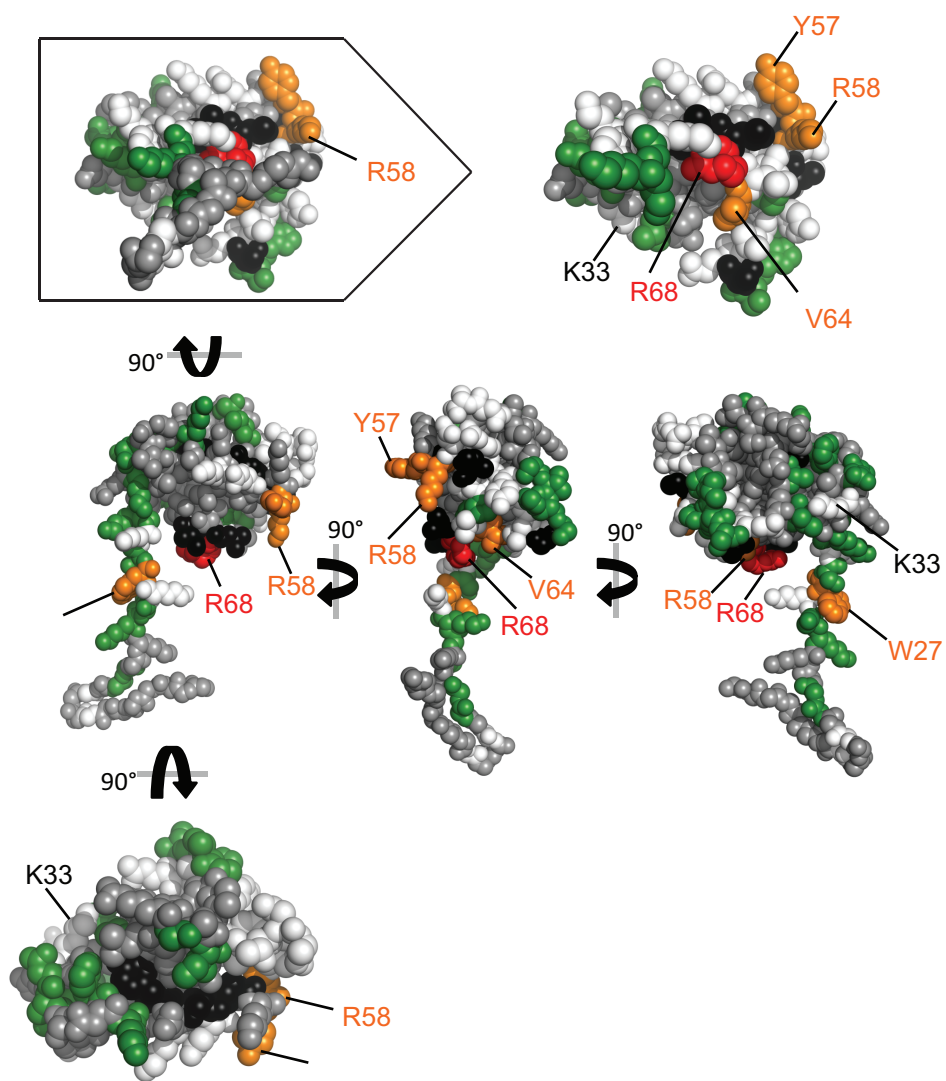

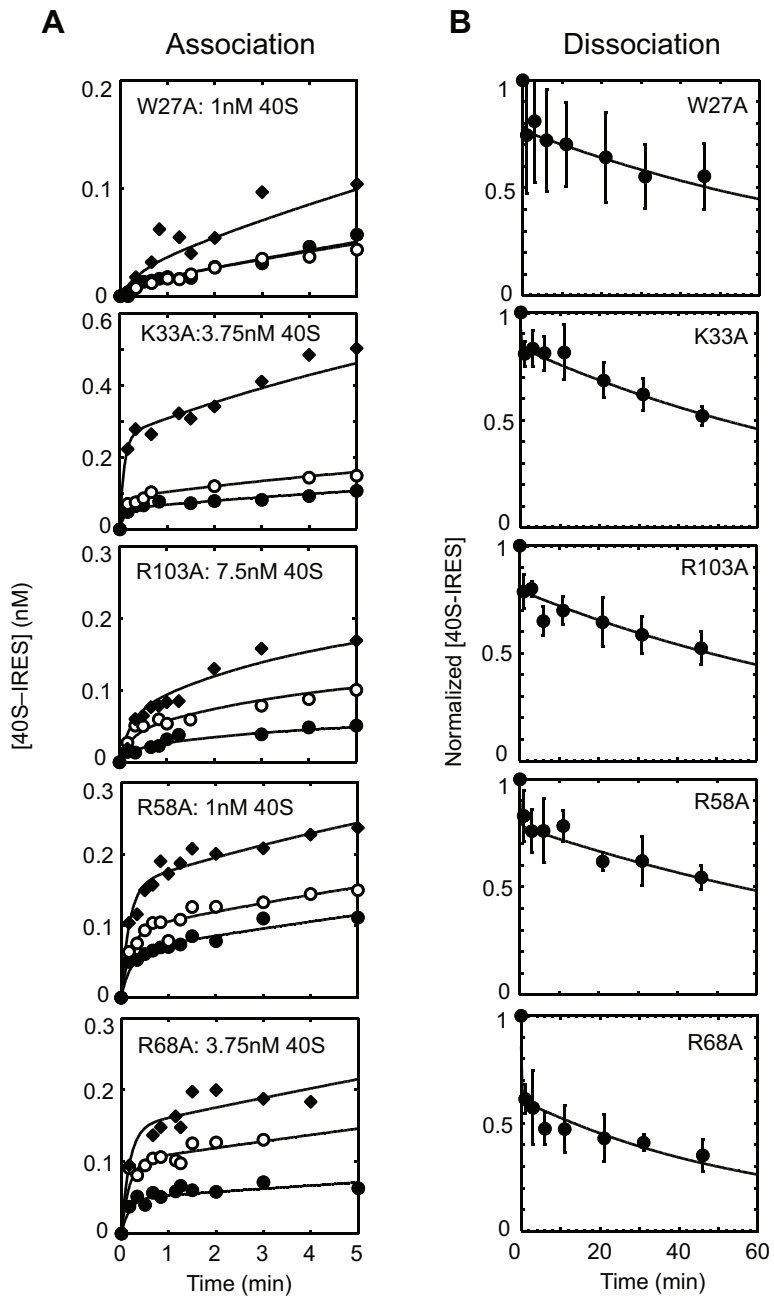

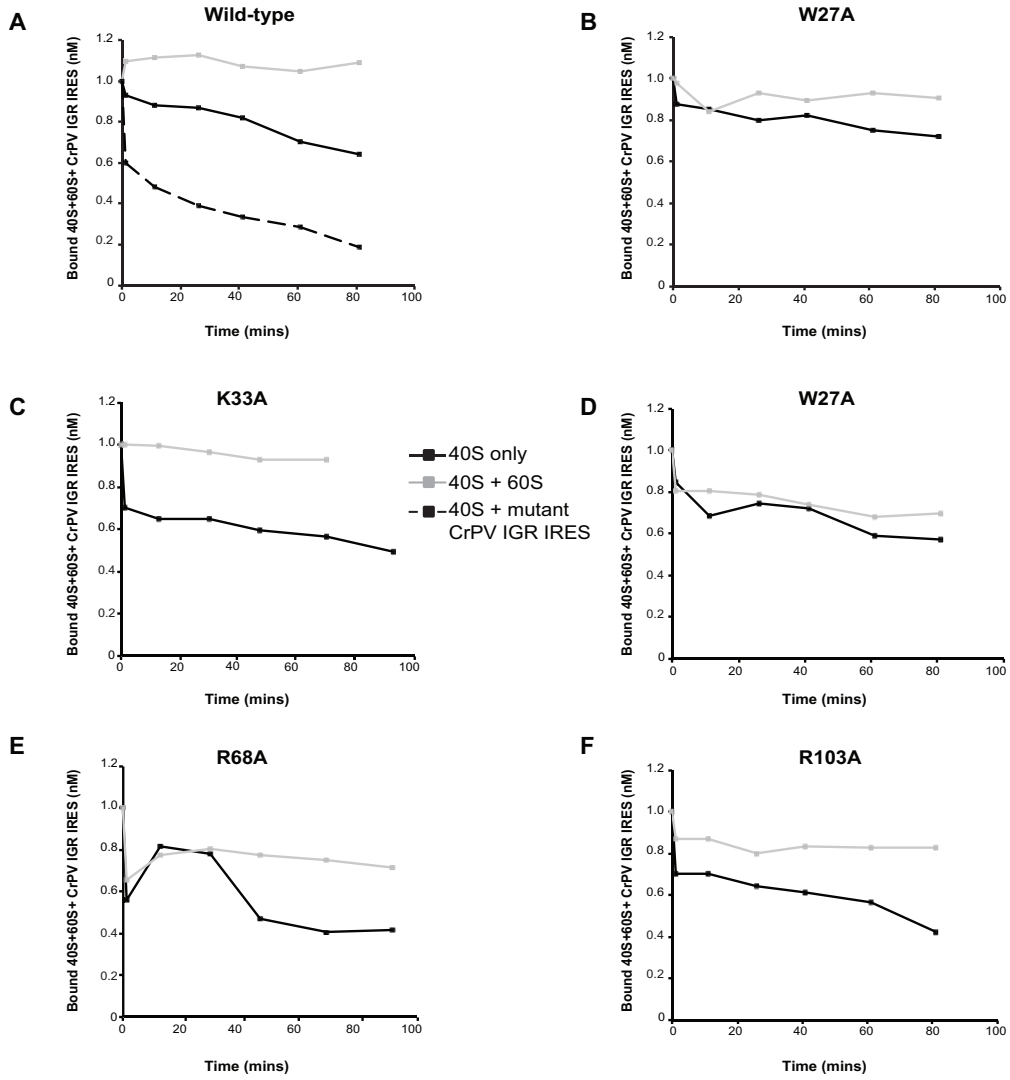

Walters\_Supplementary Fig S6

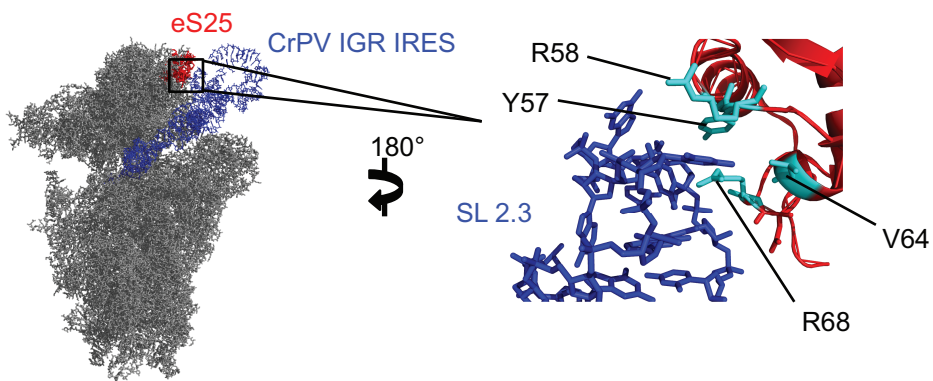

Supplement: gkaa547_supplemental_file.pdf [file gkaa547_supplemental_file.pdf]
